# Supplementary material for: Tlr9 deficiency in B cells leads to obesity by promoting inflammation and gut dysbiosis
Source: PubMed Central journal article supplement (PMC11102548; doi:10.1038/s41467-024-48611-8), 2024-05-18
Supplement: 41467_2024_48611_MOESM3_ESM.pdf [file 41467_2024_48611_MOESM3_ESM.pdf]

## Reporting Summary

Nature Portfolio wishes to improve the reproducibility of the work that we publish. This form provides structure for consistency and transparency in reporting. For further information on Nature Portfolio policies, see our [Editorial Policies](#) and the [Editorial Policy Checklist](#).

### Statistics

For all statistical analyses, confirm that the following items are present in the figure legend, table legend, main text, or Methods section.

- | n/a                      | Confirmed                                                                                                                                                                                                                                                                                      |
|--------------------------|------------------------------------------------------------------------------------------------------------------------------------------------------------------------------------------------------------------------------------------------------------------------------------------------|
| <input type="checkbox"/> | <input checked="" type="checkbox"/> The exact sample size ( $n$ ) for each experimental group/condition, given as a discrete number and unit of measurement                                                                                                                                    |
| <input type="checkbox"/> | <input checked="" type="checkbox"/> A statement on whether measurements were taken from distinct samples or whether the same sample was measured repeatedly                                                                                                                                    |
| <input type="checkbox"/> | <input checked="" type="checkbox"/> The statistical test(s) used AND whether they are one- or two-sided<br><i>Only common tests should be described solely by name; describe more complex techniques in the Methods section.</i>                                                               |
| <input type="checkbox"/> | <input checked="" type="checkbox"/> A description of all covariates tested                                                                                                                                                                                                                     |
| <input type="checkbox"/> | <input checked="" type="checkbox"/> A description of any assumptions or corrections, such as tests of normality and adjustment for multiple comparisons                                                                                                                                        |
| <input type="checkbox"/> | <input checked="" type="checkbox"/> A full description of the statistical parameters including central tendency (e.g. means) or other basic estimates (e.g. regression coefficient) AND variation (e.g. standard deviation) or associated estimates of uncertainty (e.g. confidence intervals) |
| <input type="checkbox"/> | <input checked="" type="checkbox"/> For null hypothesis testing, the test statistic (e.g. $F$ , $t$ , $r$ ) with confidence intervals, effect sizes, degrees of freedom and $P$ value noted<br><i>Give <math>P</math> values as exact values whenever suitable.</i>                            |
| <input type="checkbox"/> | <input checked="" type="checkbox"/> For Bayesian analysis, information on the choice of priors and Markov chain Monte Carlo settings                                                                                                                                                           |
| <input type="checkbox"/> | <input checked="" type="checkbox"/> For hierarchical and complex designs, identification of the appropriate level for tests and full reporting of outcomes                                                                                                                                     |
| <input type="checkbox"/> | <input checked="" type="checkbox"/> Estimates of effect sizes (e.g. Cohen's $d$ , Pearson's $r$ ), indicating how they were calculated                                                                                                                                                         |

*Our web collection on [statistics for biologists](#) contains articles on many of the points above.*

### Software and code

Policy information about [availability of computer code](#)

Data collection

Data analysis

For manuscripts utilizing custom algorithms or software that are central to the research but not yet described in published literature, software must be made available to editors and reviewers. We strongly encourage code deposition in a community repository (e.g. GitHub). See the Nature Portfolio [guidelines for submitting code & software](#) for further information.

### Data

Policy information about [availability of data](#)

All manuscripts must include a [data availability statement](#). This statement should provide the following information, where applicable:

- Accession codes, unique identifiers, or web links for publicly available datasets
- A description of any restrictions on data availability
- For clinical datasets or third party data, please ensure that the statement adheres to our [policy](#)

The source data is provided with the paper. The 16S rRNA gene sequencing data generated in this study have been deposited in SRA database under accession code PRJNA1093493, <https://www.ncbi.nlm.nih.gov/sra/?term=PRJNA1093493>. Total B cell RNA sequencing data generated in this study have been deposited in NCBI's Gene Expression Omnibus and are accessible through GEO Series accession number GSE263396 (<https://www.ncbi.nlm.nih.gov/geo/query/acc.cgi?acc=GSE263396>).

## Research involving human participants, their data, or biological material

Policy information about studies with [human participants or human data](#). See also policy information about [sex, gender \(identity/presentation\), and sexual orientation](#) and [race, ethnicity and racism](#).

|                                                                    |     |
|--------------------------------------------------------------------|-----|
| Reporting on sex and gender                                        | N/A |
| Reporting on race, ethnicity, or other socially relevant groupings | N/A |
| Population characteristics                                         | N/A |
| Recruitment                                                        | N/A |
| Ethics oversight                                                   | N/A |

Note that full information on the approval of the study protocol must also be provided in the manuscript.

## Field-specific reporting

Please select the one below that is the best fit for your research. If you are not sure, read the appropriate sections before making your selection.

Life sciences       Behavioural & social sciences       Ecological, evolutionary & environmental sciences

For a reference copy of the document with all sections, see [nature.com/documents/nr-reporting-summary-flat.pdf](https://www.nature.com/documents/nr-reporting-summary-flat.pdf)

## Life sciences study design

All studies must disclose on these points even when the disclosure is negative.

|                 |                                                                                                                                                                                                                                                                 |
|-----------------|-----------------------------------------------------------------------------------------------------------------------------------------------------------------------------------------------------------------------------------------------------------------|
| Sample size     | Sample size chosen was based on 1) G-Power calculation, 2) pilot experiments; 3) availability of all the mouse strains                                                                                                                                          |
| Data exclusions | no data exclusion                                                                                                                                                                                                                                               |
| Replication     | The the times of replication in each experiment are listed in every figure legend. All the experiments were performed at least twice with similar results.                                                                                                      |
| Randomization   | Two types of mice were used in this study - gene knock out mice and control mice. The male mice were used randomly in each group for different experiments.                                                                                                     |
| Blinding        | Prior to the experiments, mice were randomly and blinded grouped. Data collection and analysis were semi blinded, as the knockout mice were more obese and the investigators could identify the group without knowing that type of the mice in the experiments. |

## Reporting for specific materials, systems and methods

We require information from authors about some types of materials, experimental systems and methods used in many studies. Here, indicate whether each material, system or method listed is relevant to your study. If you are not sure if a list item applies to your research, read the appropriate section before selecting a response.

### Materials & experimental systems

|                                     |                                                                 |
|-------------------------------------|-----------------------------------------------------------------|
| n/a                                 | Involvement in the study                                        |
| <input type="checkbox"/>            | <input checked="" type="checkbox"/> Antibodies                  |
| <input checked="" type="checkbox"/> | <input type="checkbox"/> Eukaryotic cell lines                  |
| <input checked="" type="checkbox"/> | <input type="checkbox"/> Palaeontology and archaeology          |
| <input type="checkbox"/>            | <input checked="" type="checkbox"/> Animals and other organisms |
| <input checked="" type="checkbox"/> | <input type="checkbox"/> Clinical data                          |
| <input checked="" type="checkbox"/> | <input type="checkbox"/> Dual use research of concern           |
| <input checked="" type="checkbox"/> | <input type="checkbox"/> Plants                                 |

### Methods

|                                     |                                                    |
|-------------------------------------|----------------------------------------------------|
| n/a                                 | Involvement in the study                           |
| <input checked="" type="checkbox"/> | <input type="checkbox"/> ChIP-seq                  |
| <input type="checkbox"/>            | <input checked="" type="checkbox"/> Flow cytometry |
| <input checked="" type="checkbox"/> | <input type="checkbox"/> MRI-based neuroimaging    |

## Antibodies

|                 |                                                                                                                              |
|-----------------|------------------------------------------------------------------------------------------------------------------------------|
| Antibodies used | The antibodies used in this paper are provided in supplement table 1.<br>Target Type Catalogue # Application Dilution Source |
|-----------------|------------------------------------------------------------------------------------------------------------------------------|

CD44-APC Monoclonal 103011 FC 1:1000 Biolegend  
 TCRβ-PerCPcy5.5 Monoclonal 109227 FC 1:1000 Biolegend  
 CD8a-PEcy7 Monoclonal 162311 FC 1:1000 Biolegend  
 CD62L-APCcy7 Monoclonal 104427 FC 1:1000 Biolegend  
 CD4-PB Monoclonal 100427 FC 1:1000 Biolegend  
 CD21-FITC Monoclonal 123407 FC 1:1000 Biolegend  
 CD23-PE Monoclonal 101607 FC 1:1000 Biolegend  
 CD24-APC Monoclonal 101813 FC 1:1000 Biolegend  
 CD43-PerCPcy5.5 Monoclonal 143219 FC 1:1000 Biolegend  
 IgM-PEcy7 Monoclonal 406513 FC 1:1000 Biolegend  
 IgD-APCcy7 Monoclonal 405715 FC 1:1000 Biolegend  
 B220-PB Monoclonal 103230 FC 1:1000 Biolegend  
 CD5-FITC Monoclonal 100605 FC 1:1000 Biolegend  
 CD1d-APC Monoclonal 123521 FC 1:1000 Biolegend  
 B220-APCcy7 Monoclonal 103223 FC 1:1000 Biolegend  
 PD-1-APC Monoclonal 109111 FC 1:1000 Biolegend  
 CXCR5-PEcy7 Monoclonal 145515 FC 1:1000 Biolegend  
 TCRβ-APCcy7 Monoclonal 109219 FC 1:1000 Biolegend  
 CD95-PE Monoclonal 152608 FC 1:1000 Biolegend  
 GL7-APC Monoclonal 144617 FC 1:1000 Biolegend  
 IL-10- FITC Monoclonal 505005 FC 1:1000 Biolegend  
 IFN-γ-FITC Monoclonal 505805 FC 1:1000 Biolegend  
 TCRβ-APC Monoclonal 109211 FC 1:1000 Biolegend  
 IL-17a-PEcy7 Monoclonal 506939 FC 1:1000 Biolegend  
 CD8a-APCcy7 Monoclonal 100713 FC 1:1000 Biolegend  
 TNF-α-PE Monoclonal 506305 FC 1:1000 Biolegend  
 IRF4-PE Monoclonal 646403 FC 1:1000 Biolegend  
 F4/80-APC Monoclonal 123115 FC 1:1000 Biolegend

## Validation

CD44: Each lot of this antibody is quality control tested by immunofluorescent staining with flow cytometric analysis.  
 Verified Reactivity: Mouse, Human. Application: FC - Quality tested.

## Application References

(PubMed link indicates BioLegend citation)

Trowbridge IS, et al. 1982. Immunogenetics 15:299. (ICFC, IP, CMCD)  
 Katoh S, et al. 1994. J. Immunol. 153:3440. (ELISA)  
 Budd RC, et al. 1987. J. Immunol. 138:3120. (IP)  
 Camp RL, et al. 1993. J. Exp. Med. 178:497. (Block)  
 Weiss JM, et al. 1997. J. Cell Biol. 137:1137. (Block)  
 Frank NY, et al. 2005. Cancer Res. 65:4320. (IHC) PubMed  
 Cuff CA, et al. 2001. J. Clin. Invest. 108:1031. (IHC)  
 Lee JW, et al. 2006. Nature Immunol. 8:181.  
 Zhang N, et al. 2005. J. Immunol. 174:6967. PubMed  
 Huabiao C, et al. 2005. J. Immunol. 175:591. PubMed  
 Gui J, et al. 2007. Int. Immunol. 19:1201. PubMed  
 Wang XY, et al. 2008. Blood 111:2436. PubMed

TCRβ: Each lot of this antibody is quality control tested by immunofluorescent staining with flow cytometric analysis.

Verified Reactivity: Mouse. Application: FC - Quality tested.

## Application References

(PubMed link indicates BioLegend citation)

Gascoigne NJ. 1990. J. Biol. Chem. 265:9296.  
 Kruisbeek A, et al. 1991. In Current Protocols in Immunology. pp. 3.12.1. (Costim IP)  
 Davenport C, et al. 1995. J. Immunol. 155:3742. (Costim)  
 Drobyski W, et al. 1996. Blood 87:5355. (Deplete)  
 Kummer U, et al. 2001. Immunol. Lett. 75:153. (Deplete)  
 van der Heyde HC, et al. 1995. J. Immunol. 154:3985. (Deplete)  
 Tomita K, et al. 1999. Genes Dev. 13:1203. (IHC)  
 Podd BS, et al. 2006. J. Immunol. 176:6532. (IHC)  
 Ponomarev ED, et al. 2007. J. Immunol. 178:39. (IHC)  
 Chappaz S, et al. 2007. Blood doi:10.1182/blood-2007-02-074245. (FC) PubMed  
 Tsukumo S, et al. 2006. J. Immunol. 177:8365. (FC) PubMed  
 Grégoire C, et al. 1991. Proc. Natl. Acad. Sci USA 88:8077.

CD8a: Each lot of this antibody is quality control tested by immunofluorescent staining with flow cytometric analysis.

Verified Reactivity: Mouse. Application: FC - Quality tested.

## Antigen References

- Ledbetter JA, et al. 1979. Immunol. Rev. 47:63. (IHC, IP)
- Hathcock KS. 1991. Current Protocols in Immunology. 3.4.1. (Deplete)
- Takahashi K, et al. 1992. P. Natl. Acad. Sci. USA 89:5557. (Block, IP)
- Ledbetter JA, et al. 1981. J. Exp. Med. 153:1503. (Block)
- Hata H, et al. 2004. J. Clin. Invest. 114:582. (IHC)
- Fan WY, et al. 2001. Exp. Biol. Med. 226:1045. (IHC)
- Shih FF, et al. 2006. J. Immunol. 176:3438. (FC)
- Kamimura D, et al. 2006. J. Immunol. 177:306.
- Bouwer HGA, et al. 2006. P. Natl. Acad. Sci. USA 103:5102. (FC, Deplete)

10. Kao C, et al. 2005. *Int. Immunol.* 17:1607. PubMed  
 11. Ko SY, et al. 2005. *J. Immunol.* 175:3309. (FC) PubMed  
 12. Rasmussen JW, et al. 2006. *Infect. Immun.* 74:6590

CD62L: Each lot of this antibody is quality control tested by immunofluorescent staining with flow cytometric analysis.  
 Verified Reactivity: Mouse. Application: FC - Quality tested.

Application References

(PubMed link indicates BioLegend citation)

- Gallatin WM, et al. 1983. *Nature* 304:30. (IP, Block)  
 Siegelman MH, et al. 1990. *Cell* 61:611. (IP, Block)  
 Lewinsohn DM, et al. 1987. *J. Immunol.* 138:4313. (IP, Block)  
 Iwabuchi K, et al. 1991. *Immunobiology* 182:161. (CMCD)  
 Pizcueta P, et al. 1994. *Am. J. Pathol.* 145:461.  
 Reichert RA, et al. 1986. *J. Immunol.* 136:3535. (IHC, FC)  
 Olver S, et al. 2006. *Cancer Res.* 66:571.  
 Fukushima A, et al. 2006. *Invest. Ophthalmol. Vis. Sci.* 47:657. PubMed  
 Benson MJ, et al. 2007. *J. Exp. Med.* doi:10.1084/jem.20070719. (FC) PubMed  
 Chappaz S, et al. 2007. *Blood* doi:10.1182/blood-2007-02-074245. (FC) PubMed  
 Lee JW, et al. 2006. *Nature Immunol.* 8:181.

CD4: Each lot of this antibody is quality control tested by immunofluorescent staining with flow cytometric analysis.  
 Verified Reactivity: Mouse. Application: FC - Quality tested.

Application References

(PubMed link indicates BioLegend citation)

- Dialynas DP, et al. 1983. *J. Immunol.* 131:2445. (Block, IP)  
 Dialynas DP, et al. 1983. *Immunol. Rev.* 74:29. (IP, Deplete)  
 Wu L, et al. 1991. *J. Exp. Med.* 174:1617. (Costim)  
 Godfrey DJ, et al. 1994. *J. Immunol.* 152:4783. (Block)  
 Gavett SH, et al. 1994. *Am. J. Respir. Cell. Mol. Biol.* 10:587. (Deplete)  
 Schuyler M, et al. 1994. *Am. J. Respir. Crit. Care Med.* 149:1286. (Deplete)  
 Ghobrial RR, et al. 1989. *Clin. Immunol. Immunopathol.* 52:486. (Deplete)  
 Israelski DM, et al. 1989. *J. Immunol.* 142:954. (Deplete)  
 Zheng B, et al. 1996. *J. Exp. Med.* 184:1083. (IHC)  
 Frei K, et al. 1997. *J. Exp. Med.* 185:2177. (IHC)  
 Felix NJ, et al. 2007. *Nat. Immunol.* 8:388. (Block)  
 Radtke AJ, et al. 2020. *Proc Natl Acad Sci U S A.* 117:33455-65. (SB) PubMed

CD21: Each lot of this antibody is quality control tested by immunofluorescent staining with flow cytometric analysis.  
 Verified Reactivity: Mouse. Application: FC - Quality tested.

Application References

(PubMed link indicates BioLegend citation)

- Boackle S, et al. 2001 *Immunity* 15:775.  
 de Andres B, et al. 2012. *J. Immunol.* 189:2300. PubMed  
 Chiu YK, et al. 2014. *J Immunol.* 193:2207. PubMed  
 Koening PA, et al. 2014. *J Biol Chem.* 289:34490. PubMed  
 Radtke AJ, et al. 2020. *Proc Natl Acad Sci U S A.* 117:33455-65. (SB) PubMed  
 Radtke AJ, et al. 2022. *Nat Protoc.* 17:378-401. (SB) PubMed

CD23: Each lot of this antibody is quality control tested by immunofluorescent staining with flow cytometric analysis.  
 Verified Reactivity: Mouse. Application: FC - Quality tested.

Application References

(PubMed link indicates BioLegend citation)

- Waldschmidt TJ, et al. 1988. *J. Immunol.* 140:2148. (IP)  
 Rao M, et al. 1987. *J. Immunol.* 138:1845. (Block)  
 Oshiba A, et al. 1997. *J. Immunol.* 159:4056. (Block)  
 Dasic G, et al. 1999. *Eur. J. Immunol.* 29:2957. (Block)  
 Maeda K, et al. 1992. *J. Immunol.* 148:2340. (IHC)  
 Craig VJ, et al. 2011. *Cancer Res.* 71:3616. PubMed  
 Radtke AJ, et al. 2020. *Proc Natl Acad Sci U S A.* 117:33455-65. (SB) PubMed  
 Radtke AJ, et al. 2022. *Nat Protoc.* 17:378-401. (SB) PubMed

CD24: Each lot of this antibody is quality control tested by immunofluorescent staining with flow cytometric analysis.  
 Verified Reactivity: Mouse. Application: FC - Quality tested.

Application References

(PubMed link indicates BioLegend citation)

- Springer T, et al. 1978. *Eur. J. Immunol.* 8:539. (WB)  
 Crowley M, et al. 1989. *Cell. Immunol.* 118:108. (FA)  
 Veillette A, et al. 1989. *J. Exp. Med.* 170:1671. (FA)  
 Pandelakis A Flavell RA 1999 *JEM* 189:855 (FC, IHC)  
 Liu JQ, et al. 2007 *J. Immunol.* 178:6227. (FC, IF)  
 Chappaz S, et al. 2007. *Blood* doi:10.1182/blood-2007-02-074245. (FC) PubMed  
 Rucci F, et al. 2010. *Proc Natl Acad Sci USA.* 107:3024. (FC) PubMed  
 Teague TK, et al. 2010. *Int Immunol.* 22:387. (FC) PubMed  
 Gracz AD, et al. 2010. *Am J. Physiol Gastrointest Liver Physiol.* 298:590. (FC) PubMed  
 Chen CY, et al. 2008. *Endocrinology.* 10:1210. (FC, IHC) PubMed  
 Qui Q, et al. 2010. *J. Immunol.* 184:1681. (FC) PubMed

CD43: Each lot of this antibody is quality control tested by immunofluorescent staining with flow cytometric analysis.  
Verified Reactivity: Mouse. Application: FC - Quality tested.

Application References

(PubMed link indicates BioLegend citation)

Gaspari AA, et al. 1993. *J. Invest. Dermatol.* 100:247. (FC)  
Merzaban JS, et al. 2005. *J. Immunol.* 174:4051. (FC)  
Baecher-Allan CM, et al. 1993. *Immunogenetics.* 37:183. (WB)

IgM: Each lot of this antibody is quality control tested by immunofluorescent staining with flow cytometric analysis.

Verified Reactivity: Mouse. Application: FC - Quality tested.

Application References

(PubMed link indicates BioLegend citation)

Tertilt C, et al. 2009. *Infect. Immun.* 77:3044. (ELISA) PubMed

IgD: Each lot of this antibody is quality control tested by immunofluorescent staining with flow cytometric analysis.

Verified Reactivity: Mouse. Application: FC - Quality tested.

Application References

(PubMed link indicates BioLegend citation)

Nitschke L, et al. 1993. *P. Natl. Acad. Sci. USA* 90:1887. (FC)  
Weih D, et al. 2001. *J. Immunol.* 167:1909. (IHC)  
Koni PA, et al. 2001. *J. Exp. Med.* 193:741. (IHC)  
Ahuja A, et al. 2007. *J. Immunol.* 179:3351. (FC) PubMed  
Haynes NM, et al. 2007. *J. Immunol.* 179:5099. (FC)  
Good-Jacobson KL, et al. 2010. *Nat. Immunol.* 11:535. (FC) PubMed  
Tomayko MM, et al. 2010. *J. Immunol.* 185:7146. PubMed  
Park SY, et al. 2013. *J. Immunol.* 190:1094. PubMed  
Rouaud P, et al. 2014. *J Exp Med.* 211:975. PubMed  
Radtke AJ, et al. 2020. *Proc Natl Acad Sci U S A.* 117:33455-65. (SB) PubMed  
Radtke AJ, et al. 2022. *Nat Protoc.* 17:378-401. (SB) PubMed

B220: Each lot of this antibody is quality control tested by immunofluorescent staining with flow cytometric analysis.

Verified Reactivity: Mouse, Human. Application: FC - Quality tested.

Application References

(PubMed link indicates BioLegend citation)

Coffman RL. 1982. *Immunol. Rev.* 69:5. (IP)  
George A, et al. 1994. *J. Immunol.* 152:1014. (Activ)  
Asensi V, et al. 1989. *Immunology* 68:204. (Activ)  
Domiaty-Saad R, et al. 1993. *J. Immunol.* 151:5936. (Activ)  
Hata H, et al. 2004. *J. Clin. Invest.* 114:582. (IHC)  
Monteith CE, et al. 1996. *Can. J. Vet. Res.* 60:193. (IHC)  
Shih FF, et al. 2006. *J. Immunol.* 176:3438. (FC)  
Chang C L-T, et al. 2007. *J. Immunol.* 178:6984.  
Fazilleau N, et al. 2007. *Nature Immunol.* 8:753.  
Lang GL, et al. 2008. *Blood* 111:2158. PubMed  
Charles N, et al. 2010. *Nat. Med.* 16:701. (FC) PubMed  
del Rio ML, et al. 2011. *Transpl. Int.* 24:501. (FC) PubMed

CD5: Each lot of this antibody is quality control tested by immunofluorescent staining with flow cytometric analysis.

Verified Reactivity: Mouse. Application: FC - Quality tested.

Application References

(PubMed link indicates BioLegend citation)

Ledbetter JA, et al. 1979. *Immunol. Rev.* 47:63. (IP)  
Ledbetter JA, et al. 1980. *J. Exp. Med.* 152:280. (FC, IHC)  
Bourdeau A, et al. 2007. *Blood* doi:10.1182/blood-2006-08-044370.

CD1d: Each lot of this antibody is quality control tested by immunofluorescent staining with flow cytometric analysis.

Verified Reactivity: Mouse. Application: FC - Quality tested.

Application References

(PubMed link indicates BioLegend citation)

Fischer K, et al. 2004. *P. Natl. Acad. Sci. USA* 101:10685. (Block)  
Brozovic S, et al. 2004. *Nat. Med.* 10:535.  
Brossay L, et al. 1997. *J. Immunol.* 159:1216. (Block)  
Jiang J, et al. 2012. *PLoS One.* 7:47487. PubMed

B220: Each lot of this antibody is quality control tested by immunofluorescent staining with flow cytometric analysis.

Verified Reactivity: Mouse, Human. Application: FC - Quality tested.

Application References

(PubMed link indicates BioLegend citation)

Coffman RL. 1982. *Immunol. Rev.* 69:5. (IP)  
George A, et al. 1994. *J. Immunol.* 152:1014. (Activ)  
Asensi V, et al. 1989. *Immunology* 68:204. (Activ)  
Domiaty-Saad R, et al. 1993. *J. Immunol.* 151:5936. (Activ)  
Hata H, et al. 2004. *J. Clin. Invest.* 114:582. (IHC)  
Monteith CE, et al. 1996. *Can. J. Vet. Res.* 60:193. (IHC)  
Shih FF, et al. 2006. *J. Immunol.* 176:3438. (FC)

Chang C L-T, et al. 2007. *J. Immunol.* 178:6984.  
 Fazilleau N, et al. 2007. *Nature Immunol.* 8:753.  
 Lang GL, et al. 2008. *Blood* 111:2158. PubMed  
 Charles N, et al. 2010. *Nat. Med.* 16:701. (FC) PubMed  
 del Rio ML, et al. 2011. *Transpl. Int.* 24:501. (FC) PubMed

PD-1: Each lot of this antibody is quality control tested by immunofluorescent staining with flow cytometric analysis.  
 Verified Reactivity: Mouse. Application: FC - Quality tested.

Application References

(PubMed link indicates BioLegend citation)

Matsumoto K, et al. 2004. *J. Immunol.* 172:2530.  
 Raimondi G, et al. 2006. *J. Immunol.* 176:2808. (FC) PubMed  
 King IL, et al. 2009. *J. Exp Med* 206:1001. (FC) PubMed

CXCR5: Each lot of this antibody is quality control tested by immunofluorescent staining with flow cytometric analysis.  
 Verified Reactivity: Mouse. Application: FC - Quality tested.

Product Citations

Rydzynski CE et al. 2018. *Cell reports.* 24(13):3367-3373 . PubMed  
 Zhang R, et al. 2021. *Cell Mol Immunol.* 18:1222. PubMed  
 Manion KP, et al. 2020. *PLoS One.* 15:e0236664. PubMed  
 Shan M et al. 2018. *Immunity.* 49(4):709-724 . PubMed  
 Boyoglu-Barnum S, et al. 2014. *J Virol.* 88:10569. PubMed  
 Cohen CA, et al. 2021. *Nat Commun.* 12:4678. PubMed

TCR $\beta$ : Each lot of this antibody is quality control tested by immunofluorescent staining with flow cytometric analysis.  
 Verified Reactivity: Mouse. Application: FC - Quality tested.

Application References

(PubMed link indicates BioLegend citation)

Gascoigne NJ. 1990. *J. Biol. Chem.* 265:9296.  
 Kruisbeek A, et al. 1991. In *Current Protocols in Immunology.* pp. 3.12.1. (Costim IP)  
 Davenport C, et al. 1995. *J. Immunol.* 155:3742. (Costim)  
 Drobyski W, et al. 1996. *Blood* 87:5355. (Deplete)  
 Kummer U, et al. 2001. *Immunol. Lett.* 75:153. (Deplete)  
 van der Heyde HC, et al. 1995. *J. Immunol.* 154:3985. (Deplete)  
 Tomita K, et al. 1999. *Genes Dev.* 13:1203. (IHC)  
 Podd BS, et al. 2006. *J. Immunol.* 176:6532. (IHC)  
 Ponomarev ED, et al. 2007. *J. Immunol.* 178:39. (IHC)  
 Chappaz S, et al. 2007. *Blood* doi:10.1182/blood-2007-02-074245. (FC) PubMed  
 Tsukumo S, et al. 2006. *J.Immunol.* 177:8365. (FC) PubMed  
 Grégoire C, et al. 1991. *Proc. Natl. Acad. Sci USA* 88:8077.

CD95: Each lot of this antibody is quality control tested by immunofluorescent staining with flow cytometric analysis.  
 Verified Reactivity: Mouse. Application: FC - Quality tested.

Product Citations

Trittel S, et al. 2019. *Sci Rep.* 9:16362. PubMed  
 Zhang R, et al. 2021. *Cell Mol Immunol.* 18:1222. PubMed  
 Kim CJ, et al. 2018. *Immunity.* 49:1034. PubMed  
 Woodruff MC et al. 2018. *Cell reports.* 25(2):321-327 . PubMed  
 Pobezinskaya EL et al. 2019. *Front Immunol.* 1.079861111 . PubMed  
 Waide ML, et al. 2020. *Cell Rep.* 33:108503. PubMed  
 Wang J, et al. 2018. *Front Immunol.* 9:371. PubMed  
 Zhang YN, et al. 2020. *EBioMedicine.* 56:102819. PubMed  
 Beloor J et al. 2018. *Cell host & microbe.* 23(4):549-556 . PubMed  
 Kang X, et al. 2022. *J Immunol Res.* 2022:8118577. PubMed  
 Mandal RK, et al. 2021. *Cell Reports.* 35(6):109094. PubMed  
 Lazarian G, et al. 2021. *Cancer Cell.* 39(3):380-393.e8. PubMed

GL7: Each lot of this antibody is quality control tested by immunofluorescent staining with flow cytometric analysis.  
 Verified Reactivity: Mouse, Human. Application: FC - Quality tested.

Application References

(PubMed link indicates BioLegend citation)

Laszlo G, et al. 1993. *J. Immunol.* 150:5252. (FC, IP)  
 Hartgring SA, et al. 2012. *Arthritis Res. Ther.* 14:R137. (FC)  
 Taylor JJ, et al. 2012. *J. Exp. Med.* 209:597. (FC, IHC)  
 Balogh A, et al. 2010. *Immunol. Lett.* 130:89. (IHC)  
 Kimura N, et al. 2007. *J. Biol. Chem.* 282:32200. (ELISA, FC)

IL-10: Each lot of this antibody is quality control tested by intracellular immunofluorescent staining with flow cytometric analysis.  
 Verified Reactivity: Mouse. Application: ICFC - Quality tested.

Application References

(PubMed link indicates BioLegend citation)

Simkin G, et al. 2000. *J. Immunol.* 164:2457.  
 Kitagaki K, et al. 2002. *Clin. Diagn. Lab Immunol.* 9:1260.  
 Khanna A, et al. 2000. *J. Immunol.* 164:1346.  
 Sander B, et al. 1993. *J. Immunol. Methods* 166:201.  
 Litton M, et al. 1994. *J. Immunol. Methods* 175:47.

Andersson U, et al. 1999. Detection and quantification of gene expression. New York:Springer-Verlag.  
 Finkelman F, et al. 2003. Curr. Prot. Immunol. John Wiley & Sons New York. Unit 6.28.  
 Wang W, et al. 2004. FASEB J. 18:1043.  
 Brummel R and Lenert P. 2005. J. Immunol. 174:2429.  
 Lawson BR, et al. 2007. J. Immunol. 178:5366.  
 Xu G, et al. 2007. J. Immunol. 179:5358. PubMed  
 Brummel R, et al. 2005. J. Immunol.174:2429. PubMed

IFN- $\gamma$ : Each lot of this antibody is quality control tested by intracellular immunofluorescent staining with flow cytometric analysis.  
 Verified Reactivity: Mouse. Application: ICFC - Quality tested.

#### Application References

(PubMed link indicates BioLegend citation)

Abrams J, et al. 1992. Immunol. Rev. 127:5. (ELISA, Neut)  
 Sander B, et al. 1993. J. Immunol. Meth. 166:201. (ELISA, Neut)  
 Abrams J, et al. 1995. Curr. Prot. Immunol. John Wiley and Sons, New York. Unit 6.20. (ELISA, Neut)  
 Yang X, et al. 1993. J. Immunoassay 14:129. (ELISA)  
 Klinman D, et al. 1994. Curr. Prot. Immunol. John Wiley and Sons, New York. Unit 6.19. (ELISPOT)  
 Sander B, et al. 1991. Immunol. Rev. 119:65. (IHC)  
 Ferrick D, et al. 1995. Nature 373:255. (FC)  
 Ko SY, et al. 2005. J. Immunol. 175:3309. (FC) PubMed  
 Peterson KE, et al. 2000. J. Virol. 74:5363. (Neut)  
 DeKrey GK, et al. 1998. Infect. Immun. 66:827. (Neut)  
 Dzhagalov I, et al. 2007. J. Immunol. 178:2113. (ELISA)  
 Lawson BR, et al. 2007. J. Immunol. 178:5366. (FC)

TCR $\beta$ : Each lot of this antibody is quality control tested by immunofluorescent staining with flow cytometric analysis.

Verified Reactivity: Mouse. Application: FC - Quality tested.

#### Application References

(PubMed link indicates BioLegend citation)

Gascoigne NJ. 1990. J. Biol. Chem. 265:9296.  
 Kruisbeek A, et al. 1991. In Current Protocols in Immunology. pp. 3.12.1. (Costim IP)  
 Davenport C, et al. 1995. J. Immunol. 155:3742. (Costim)  
 Drobyski W, et al. 1996. Blood 87:5355. (Deplete)  
 Kummer U, et al. 2001. Immunol. Lett. 75:153. (Deplete)  
 van der Heyde HC, et al. 1995. J. Immunol. 154:3985. (Deplete)  
 Tomita K, et al. 1999. Genes Dev. 13:1203. (IHC)  
 Podd BS, et al. 2006. J. Immunol. 176:6532. (IHC)  
 Ponomarev ED, et al. 2007. J. Immunol. 178:39. (IHC)  
 Chappaz S, et al. 2007. Blood doi:10.1182/blood-2007-02-074245. (FC) PubMed  
 Tsukumo S, et al. 2006. J. Immunol. 177:8365. (FC) PubMed  
 Grégoire C, et al. 1991. Proc. Natl. Acad. Sci USA 88:8077.

IL17a: Each lot of this antibody is quality control tested by intracellular immunofluorescent staining with flow cytometric analysis.

Verified Reactivity: Mouse. Application: ICFC - Quality tested.

#### Application References

(PubMed link indicates BioLegend citation)

Kennedy J, et al. 1996. J. Interferon Cytokine Res. 16:611.  
 Schubert D, et al. 2004. J. Immunol. 172:4503. (ICFC)  
 Infante-Duarte C, et al. 2000. J. Immunol. 165:6107. (ICFC, ELISA Capture)  
 Harrington LE, et al. 2005. Nature Immunol. doi:10.1038/ni1254. (ICFC, ELISA Capture)  
 Nekrasova T, et al. 2005. J. Immunol. 175:2734. (ELISPOT Capture)  
 Yen D, et al. 2006. J. Clin. Invest. 116:1310. (Neut)  
 Ehirchiou D, et al. 2007. J. Exp. Med. 204:1519. (ICFC)  
 Kang SG, et al. 2007. J. Immunol. 179:3724. (ICFC)  
 Smith E, et al. 2008. J. Immunol. 181:1357. (Neut) PubMed  
 Neufert C, et al. 2007. Eur. J. Immunol. 37:1809. PubMed  
 Wang C, et al. 2009. Mucosal Immunol 2:173. (ICFC) PubMed  
 Cui Y, et al. 2009. Invest. Ophth. Vis. Sci. 50:5811. (ICFC) PubMed

CD8a: Each lot of this antibody is quality control tested by immunofluorescent staining with flow cytometric analysis.

Verified Reactivity: Mouse. Application: FC - Quality tested.

#### Application References

(PubMed link indicates BioLegend citation)

Ledbetter JA, et al. 1979. Immunol. Rev. 47:63. (IHC, IP)  
 Hathcock KS. 1991. Current Protocols in Immunology. 3.4.1. (Deplete)  
 Takahashi K, et al. 1992. P. Natl. Acad. Sci. USA 89:5557. (Block, IP)  
 Ledbetter JA, et al. 1981. J. Exp. Med. 153:1503. (Block)  
 Hata H, et al. 2004. J. Clin. Invest. 114:582. (IHC)  
 Fan WY, et al. 2001. Exp. Biol. Med. 226:1045. (IHC)  
 Shih FF, et al. 2006. J. Immunol. 176:3438. (FC)  
 Kamimura D, et al. 2006. J. Immunol. 177:306.  
 Bouwer HGA, et al. 2006. P. Natl. Acad. Sci. USA 103:5102. (FC, Deplete)  
 Kao C, et al. 2005. Int. Immunol. 17:1607. PubMed  
 Ko SY, et al. 2005. J. Immunol. 175:3309. (FC) PubMed  
 Rasmussen JW, et al. 2006. Infect. Immun. 74:6590. PubMed



TNF- $\alpha$ : Each lot of this antibody is quality control tested by intracellular immunofluorescent staining with flow cytometric analysis. Verified Reactivity: Mouse. Application: ICFC - Quality tested.

#### Application References

(PubMed link indicates BioLegend citation)

Abrams J, et al. 1992. *Immunol. Rev.* 127:5. (Neut)  
 Abrams J, et al. 1995. *Curr. Prot. Immunol.* John Wiley and Sons, New York. Unit 6.20  
 Mo X, et al. 1995. *J. Virol.* 69:1288.  
 Sarawar S, et al. 1994. *J. Immunol.* 153:1246.  
 Via C, et al. 2001. *J. Immunol.* 167:6821. (Neut)  
 Infante-Duarte C, et al. 2000 *J. Immunol.* 165:6107. (FC)  
 Jacobs M, et al. 2000. *Immunology* 100:494. (IHC)  
 Marinova-Mutachieva L, et al. 1997. *Clin. Exp. Immunol.* 107:507. (IHC)  
 Williams RO, et al. 2000. *J. Immunol.* 165:7240. (IHC)  
 Scanga CA, et al. 1999. *Infect. Immun.* 67:4531. (Neut)  
 Akilov OE, et al. 2007. *J. Leukoc. Biol.* 2007;10.1189/jlb.0706439. (FC)  
 Lawson BR, et al. 2007. *J. Immunol.* 178:5366. (FC)

IRF4: Each lot of this antibody is quality control tested by intracellular immunofluorescent staining with flow cytometric analysis.

Verified Reactivity: Mouse. Application: ICFC - Quality tested.

#### Application References

(PubMed link indicates BioLegend citation)

Zheng Y, et al. 2009. *Nature* 458:351  
 Yin SY, et al. 2011. *Exp Cell Res.* 317:2210. PubMed  
 Radtke AJ, et al. 2020. *Proc Natl Acad Sci USA.* 117:33455-33465. (SB) PubMed  
 Radtke AJ, et al. 2022. *Nat Protoc.* 17:378-401. (SB) PubMed

F4/80: Each lot of this antibody is quality control tested by immunofluorescent staining with flow cytometric analysis.

Verified Reactivity: Mouse. Application: FC - Quality tested.

#### Application References

(PubMed link indicates BioLegend citation)

Schaller E, et al. 2002. *Mol. Cell. Biol.* 22:8035. (IHC)  
 Stevceva L, et al. 2001. *BMC Clin Pathol.* 1:3. (IHC)  
 Kobayashi M, et al. 2008. *J. Leukoc. Biol.* 83:1354. PubMed  
 Poeckel D, et al. 2009. *J. Biol Chem.* 284:21077. PubMed  
 Glass AM, et al. 2013. *J. Immunol.* 190:4830. PubMed  
 Koehm S, et al. 2007. *J. Allergy Clin. Immunol.* 120:570. (IHC)  
 Rankin AL, et al. 2010. *J. Immunol.* 184:1526. (IHC)  
 Sasi SP, et al. 2014. *J Biol Chem.* 289:14178. PubMed  
 Thakus VS, et al. 2014. *Toxicol Lett.* 230:322. PubMed  
 Watson NB, et al. 2015. *J Immunol.* 194:2796. PubMed  
 Hirakawa H, et al. 2015. *PLoS One.* 10:119360. PubMed  
 Radtke AJ, et al. 2020. *Proc Natl Acad Sci U S A.* 117:33455-65. (SB) PubMed

## Animals and other research organisms

Policy information about [studies involving animals](#); [ARRIVE guidelines](#) recommended for reporting animal research, and [Sex and Gender in Research](#)

### Laboratory animals

Tlr9fl/fl C57BL/6 breeder mice were kindly provided by Dr. Mark Shlomchik (University of Pittsburgh). Cd19Cre+/ $\pm$ C57BL/6 breeders were purchased from The Jackson Laboratory (RRID: IMSR\_JAX:006785). Tlr9fl/fl and Cd19Cre+/ $\pm$  B6 mice were bred to generate Tlr9fl/fl/Cd19Cre+/ $\pm$ , which were then intercrossed to obtain B cell-specific Tlr9-deficient (Tlr9fl/fl/Cd19Cre+/-) and control (Tlr9fl/fl/Cd19Cre-/-) B6 mice.

C57BL/6 mice were originally purchased from the Jax Lab (#000664).

Germ-free (GF) C57BL/6 breeders were kindly provided by Dr. Richard Flavell (Yale University) and bred in the Yale gnotobiotic mouse facility.

Rag1-/- B6 mice were originally from the Jax Lab (#002216) and Rag1-/- GF C57BL/6 breeders were kindly provided by Dr. Noah Palm (Yale University) and maintained in the Yale gnotobiotic mouse facility.

Rag1-/- B6 mice used in this study were conventionalized from Rag1-/- GF C57BL/6 mice and kept in SPF environment.

Body weight observation/ immune cell phenotype/ gut microbiota investigations in the experiments of high fat diet fed Tlr9fl/fl/Cd19Cre+/- (KO) and Tlr9fl/fl/Cd19Cre-/- (Ctr) mice were done when the mice were 18-22-week old. The immune phenotype of the KO and Ctr mice used in normal food diet experiments were 6-8-week old. The germ free mice were gavaged when they were 4-week-old, and observed for 2 weeks or 4 weeks. The Rag-/- B6 mice was transferred cells when 4 weeks old and observed for 14-18 week (18-22-week old). The Rag1-/- GF C57BL/6 mice were gavaged and transferred immune cells when 4 weeks old and observed 4 weeks (8-week-old).

### Wild animals

No wild animals were used in the study

### Reporting on sex

It is well established by scientists in the field that male mice are a better sex for high fat diet induced obesity (HFDIO) and most of published studies in HFDIO used male mice. Our study also used male mice.

### Field-collected samples

No field collected samples were used in the study



## Ethics oversight

All the experimental procedures were in accordance with federal regulation and all the protocols used for animal experimentation were approved by Yale Animal Care and Use Committee of Yale University.

Note that full information on the approval of the study protocol must also be provided in the manuscript.

## Plants

## Seed stocks

N/A

## Novel plant genotypes

N/A

## Authentication

N/A

## Flow Cytometry

### Plots

Confirm that:

- The axis labels state the marker and fluorochrome used (e.g. CD4-FITC).
- The axis scales are clearly visible. Include numbers along axes only for bottom left plot of group (a 'group' is an analysis of identical markers).
- All plots are contour plots with outliers or pseudocolor plots.
- A numerical value for number of cells or percentage (with statistics) is provided.

### Methodology

## Sample preparation

Bone marrow (BM), spleen (SPL), mesenteric lymph nodes (MLN) and Peyer's patches (PP), were dissected and collected into test tubes containing 3-5ml sterile PBS. All the tissues were homogenized by gently grinding the tissue with the frosted end of glass slides followed by filtering through a nylon filter (150µm) to remove debris. Red blood cells in splenocytes were lysed by hypotonic shock.

## Instrument

BD LSR II flow cytometer.

## Software

Flowjo

## Cell population abundance

No sorting by flow cytometry

## Gating strategy

The cells were first gated on live and single cells, followed by gating out the cells that were stained with control antibodies. The cells were then further gated on the populations of interest.

- Tick this box to confirm that a figure exemplifying the gating strategy is provided in the Supplementary Information.
